# Supplementary material
Source: PubMed Central journal article supplement (PMC2724222)

**Supplement Figure 1.**

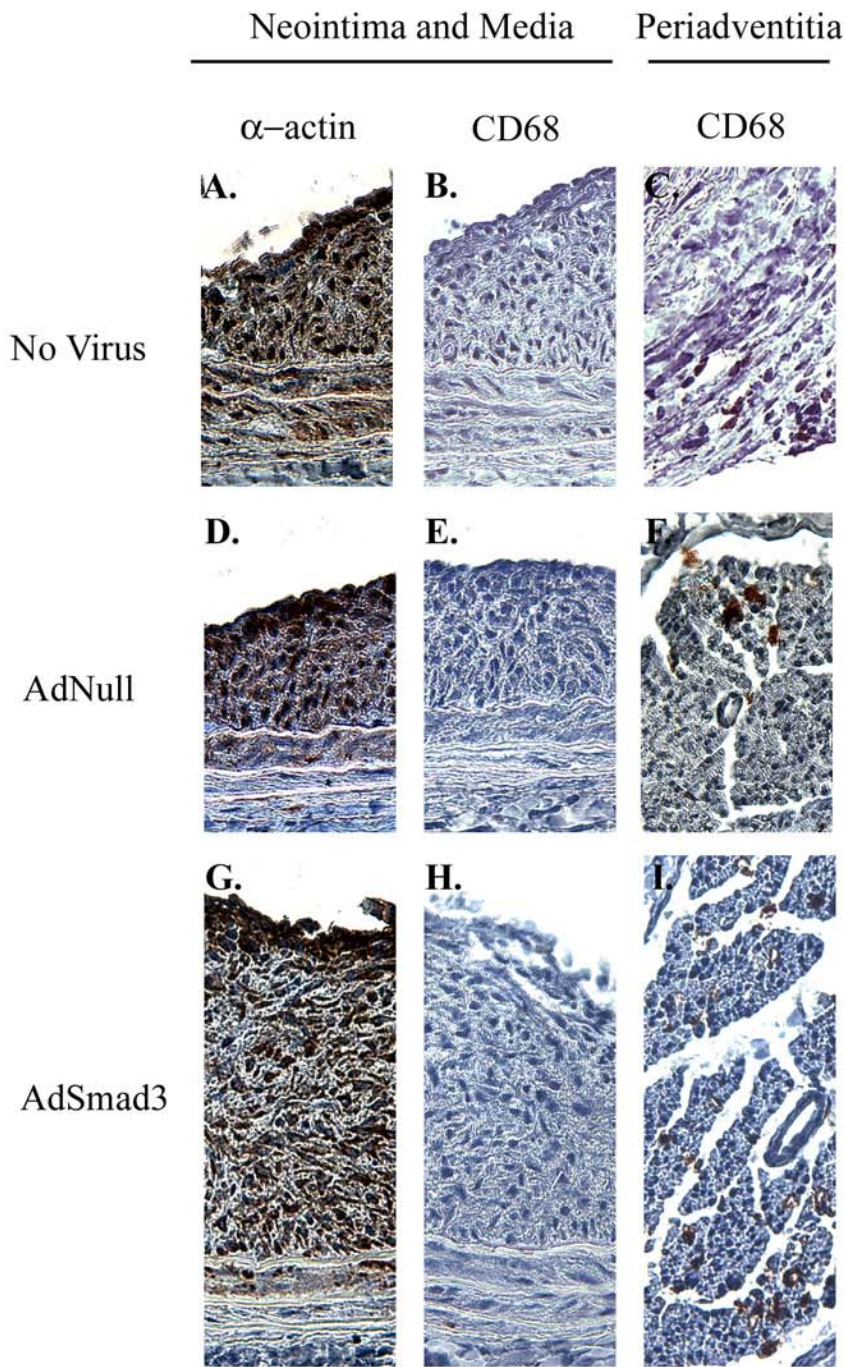

Supplement: 91478.2007_1.pdf [file 91478.2007_1.pdf]

**Supplement Figure 2.**

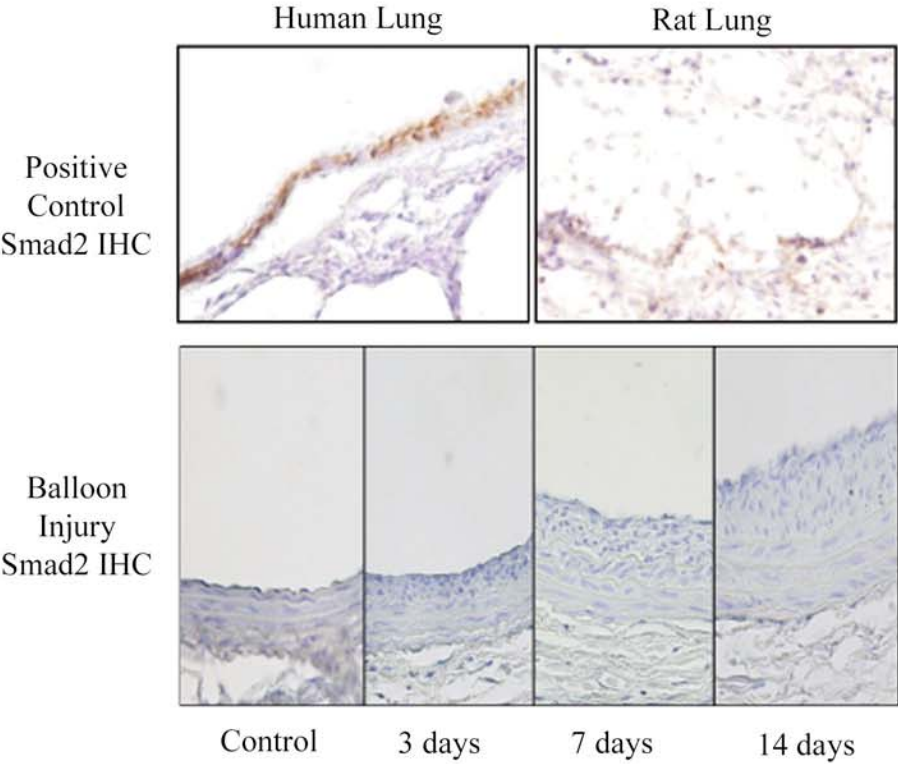

Supplement: 91478.2007_2.pdf [file 91478.2007_2.pdf]

### Supplement Figure 3.

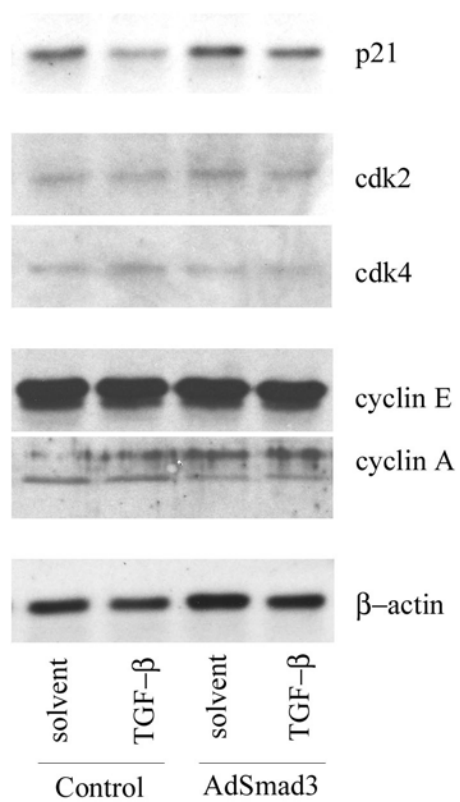

Supplement: 91478.2007_3.pdf [file 91478.2007_3.pdf]
